# Supplementary material for: Non-aqueous direct leaching using a reusable nickel-selective amic-acid extractant for efficient lithium-ion battery recycling
Source: Royal Society of Chemistry journal article supplement (doi:10.1039/d4su00414k), 2024-10-07
Supplement: d4su00414k1.pdf [file d4su00414k1.pdf]

Supplementary information

**Non-aqueous direct leaching using a reusable nickel-selective amic-acid extractant for efficient lithium-ion battery recycling**

Matsui Takejirou,<sup>a</sup> Takafumi Hanada<sup>b</sup> and Masahiro Goto<sup>\*a</sup>

<sup>a</sup> Department of Applied Chemistry, Graduate School of Engineering, Kyushu University, 744 Motooka, Fukuoka 819-0395, Japan

<sup>b</sup> Department of Applied Chemistry, Graduate School of Technology, Industrial and Social Sciences, Tokushima University, 2-1 Minamijosanjima, Tokushima 770-8506, Japan

\*Corresponding author. E-mail address: m-goto@mail.cstm.kyushu-u.ac.jp

Number of pages: 11

Number of figures: 3

Number of tables: 9

**Sequence of Contents:**

Figure S1: Liquid–liquid extraction efficiencies of Li, Co, Ni and Mn with Versatic10.

Figure S2: Liquid–liquid extraction efficiencies of Li, Co, Ni and Mn with D2EHAG.

Figure S3: Liquid–liquid extraction efficiencies of Li, Co, Ni and Mn with D2EHPA.

Table S1: Component of the black mass recovered from a hybrid electric vehicle.

Table S2–S9: Data reproducibility

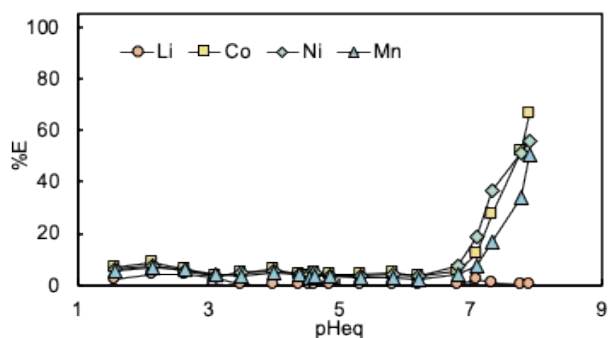

Figure S1 Liquid-liquid extraction efficiencies of Li, Co, Ni and Mn with Versatic10. Organic phase: 0.1M Versatic10 diluted in n-dodecane. Aqueous phase: 0.001M metals and 0.1M  $\text{NH}_4(\text{SO}_4)_2$ . Adjust pH with sulfuric acid and ammonia solution. Experimental conditions: O/A = 1, at 298 K at 1500 rpm for 1 h.

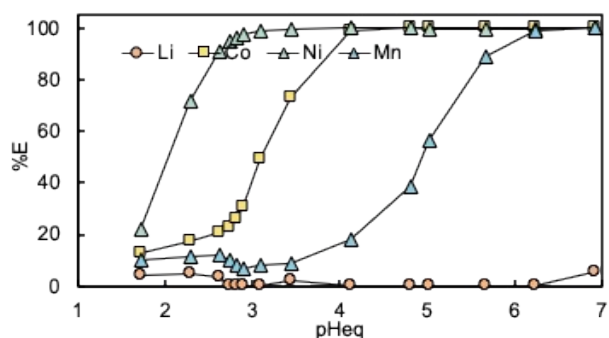

Figure S2 Liquid-liquid extraction efficiencies of Li, Co, Ni and Mn with D2EHAG. Organic phase: 0.1M D2EHAG diluted in n-dodecane. Aqueous phase: 0.001M metals and 0.1M  $\text{NH}_4(\text{SO}_4)_2$ . Adjust pH with sulfuric acid and ammonia solution. Experimental conditions: O/A = 1, at 298 K at 1500 rpm for 1 h.

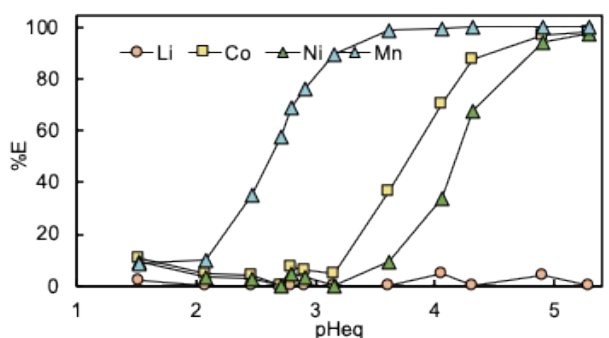

Figure S3 Liquid-liquid extraction efficiencies of Li, Co, Ni and Mn with D2EHPA. Organic phase: 0.1M D2EHPA diluted in n-dodecane. Aqueous phase: 0.001M metals and 0.1M  $\text{NH}_4(\text{SO}_4)_2$ . Adjust pH with sulfuric acid and ammonia solution. Experimental conditions: O/A = 1, at 298 K at 1500 rpm

for 1 h.

Table S1 Component of the black mass recovered from a hybrid electric vehicle.

| Metal                 | Li   | Cu   | Ni   | Mn   | Co    | Al   | Fe  |
|-----------------------|------|------|------|------|-------|------|-----|
| [g kg <sup>-1</sup> ] | 37.6 | 15.0 | 30.7 | 38.5 | 149.5 | 28.7 | 5.3 |

### Data reproducibility

Table S2 Leaching efficiencies of the metals from NMC by different concentrations of Versatic10, D2EHPA, and D2EHAG diluted in *n*-dodecane with 0.1 mol/L ascorbic acid and a saturated amount of water. Experimental conditions: S/L = 10 g/L, heating at 333 K at 400 rpm for 24 h. SE represent standard error (n=3).

| Extractant | mol/L | n       | Leaching efficiency (%L) |            |            |            |
|------------|-------|---------|--------------------------|------------|------------|------------|
|            |       |         | Li                       | Co         | Ni         | Mn         |
| Versatic10 | 0.15  | 1       | 1.51267578               | 0          | 0          | 0.26702785 |
|            |       | 2       | 1.41738398               | 0          | 0          | 0.26467302 |
|            |       | 3       | 1.36423444               | 0          | 0          | 0.26375447 |
|            |       | Average | 1.4314314                | 0          | 0          | 0.26515178 |
|            |       | SE      | 0                        | 0          | 0          | 0.00097479 |
| Versatic10 | 0.3   | 1       | 1.51132029               | 0          | 0          | 0.26297221 |
|            |       | 2       | 1.44979045               | 0          | 0          | 0.26166196 |
|            |       | 3       | 1.3869538                | 0          | 0          | 0.26283709 |
|            |       | Average | 1.44935485               | 0          | 0          | 0.26249042 |
|            |       | SE      | 0.03590218               | 0          | 0          | 0.00041606 |
| Versatic10 | 0.45  | 1       | 1.64346819               | 0          | 0          | 0.26323245 |
|            |       | 2       | 1.54949818               | 0          | 0          | 0.26101364 |
|            |       | 3       | 1.57719222               | 0          | 0          | 0.26480477 |
|            |       | Average | 1.59005286               | 0          | 0          | 0.26301695 |
|            |       | SE      | 0.02787853               | 0          | 0          | 0.0010997  |
| Versatic10 | 0.6   | 1       | 1.6459114                | 0          | 0          | 0.26623391 |
|            |       | 2       | 1.59770479               | 0          | 0          | 0.27145418 |
|            |       | 3       | 1.53420435               | 0          | 0          | 0.26857786 |
|            |       | Average | 1.59260685               | 0          | 0          | 0.26875532 |
|            |       | SE      | 0.03234763               | 0          | 0          | 0.00150957 |
| D2EHPA     | 0.15  | 1       | 25.6734633               | 31.196325  | 0.32741045 | 40.9269382 |
|            |       | 2       | 24.185945                | 25.4291417 | 0.06841412 | 41.6838778 |

|        |      |         |            |            |            |            |
|--------|------|---------|------------|------------|------------|------------|
|        |      | 3       | 28.418061  | 32.7538049 | 0.2335079  | 41.7494304 |
|        |      | Average | 1.23954145 | 2.22781456 | 0.07570144 | 0.26391793 |
|        |      | SE      | 1.23954145 | 2.22781456 | 0.07570144 | 0.26391793 |
| D2EHPA | 0.3  | 1       | 28.2938575 | 23.8351436 | 0.07627336 | 35.8509784 |
|        |      | 2       | 31.0640967 | 26.2921407 | 0.06838024 | 38.7413272 |
|        |      | 3       | 34.3271682 | 27.4810211 | 0.00975894 | 43.4203223 |
|        |      | Average | 31.2283742 | 25.8694351 | 0.05147085 | 39.3375426 |
|        |      | SE      | 1.7436026  | 1.07348586 | 0.02098005 | 2.20532284 |
|        |      |         |            |            |            |            |
| D2EHPA | 0.45 | 1       | 46.3862982 | 35.9040574 | 0.19321706 | 51.9409887 |
|        |      | 2       | 47.7176574 | 36.9391743 | 0.29076003 | 53.8471132 |
|        |      | 3       | 38.5374467 | 33.0959842 | 0.23315921 | 42.7358186 |
|        |      | Average | 44.2138008 | 35.313072  | 0.23904543 | 49.5079735 |
|        |      | SE      | 2.86408078 | 1.1481108  | 0.02831162 | 3.43049507 |
|        |      |         |            |            |            |            |
| D2EHPA | 0.6  | 1       | 40.8111155 | 30.1890582 | 0.142705   | 43.8412258 |
|        |      | 2       | 45.4851326 | 37.1160222 | 0.29363992 | 48.2287138 |
|        |      | 3       | 43.1977706 | 27.8697888 | 0.16834169 | 46.1308346 |
|        |      | Average | 43.1646729 | 31.7249564 | 0.2015622  | 46.0669247 |
|        |      | SE      | 1.34937399 | 2.77743561 | 0.04662989 | 1.26696172 |
|        |      |         |            |            |            |            |
| D2EHAG | 0.15 | 1       | 24.8239338 | 39.5571196 | 40.1092374 | 33.9595918 |
|        |      | 2       | 26.7032172 | 43.7855728 | 45.2389614 | 30.7867401 |
|        |      | 3       | 31.2070772 | 44.2053097 | 44.6540508 | 37.9689986 |
|        |      | Average | 27.5780761 | 42.5160007 | 43.3340832 | 34.2384435 |
|        |      | SE      | 1.89386407 | 1.48439414 | 1.62123953 | 2.07802215 |
|        |      |         |            |            |            |            |
| D2EHAG | 0.3  | 1       | 48.4063233 | 72.7833137 | 74.8890329 | 48.6529419 |
|        |      | 2       | 51.8831677 | 77.7454647 | 79.816527  | 52.5424962 |
|        |      | 3       | 44.42153   | 70.5215245 | 72.7714002 | 48.3246436 |
|        |      | Average | 48.237007  | 73.6834343 | 75.8256533 | 49.8400272 |
|        |      | SE      | 2.15565226 | 2.13338472 | 2.0869752  | 1.35455391 |
|        |      |         |            |            |            |            |
| D2EHAG | 0.45 | 1       | 68.1399363 | 93.9645119 | 94.738731  | 68.1905157 |
|        |      | 2       | 67.9360914 | 92.8322911 | 93.8012357 | 67.3621082 |
|        |      | 3       | 62.6381506 | 91.3126267 | 92.7178662 | 65.66354   |
|        |      | Average | 66.2380594 | 92.7031432 | 93.752611  | 67.0720546 |
|        |      | SE      | 1.80091606 | 0.76825193 | 0.58387979 | 0.74375173 |
|        |      |         |            |            |            |            |
| D2EHAG | 0.6  | 1       | 72.5946232 | 96.2111082 | 96.5800361 | 79.820383  |
|        |      | 2       | 70.694544  | 93.2847565 | 93.4947641 | 75.8034688 |

|  |         |            |            |            |            |
|--|---------|------------|------------|------------|------------|
|  | 3       | 70.2850793 | 94.678574  | 94.6961235 | 78.2059728 |
|  | Average | 71.1914155 | 94.7248129 | 94.9236412 | 77.9432749 |
|  | SE      | 0.71149119 | 0.84508128 | 0.89787697 | 1.16699865 |

Table S3 Saturated water contents in *n*-dodecane containing the extractants D2EHAG and D2EHPA. SE represent standard error (n=5).

| Extractant | n       | Water content (vol%) |             |             |             |             |
|------------|---------|----------------------|-------------|-------------|-------------|-------------|
|            |         | 0 mol/L              | 0.15 mol/L  | 0.3 mol/L   | 0.45 mol/L  | 0.6 mol/L   |
| D2EHAG     | 1       | 0.004409448          | 0.835144567 | 1.6513731   | 2.492672468 | 3.399062056 |
|            | 2       | 0.010631398          | 0.844592742 | 1.72815292  | 2.550757924 | 3.240164876 |
|            | 3       | 0.010271958          | 0.804080449 | 1.71559882  | 2.525633539 | 3.25773812  |
|            | 4       | 0.005495412          | 0.822850824 | 1.71922556  | 2.598452571 | 3.307490541 |
|            | 5       | 0.01714745           | 0.861421609 | 1.73256382  | 2.73564005  | 3.409355395 |
|            | Average | 0.009591133          | 0.833618038 | 1.709382844 | 2.58063131  | 3.322762198 |
|            | SE      | 0.002261287          | 0.009706222 | 0.014816074 | 0.042425958 | 0.035074009 |
| D2EHPA     | 1       | 0.004409448          | 0.017367882 | 0.066214032 | 0.110932771 | 0.169010372 |
|            | 2       | 0.010631398          | 0.009647313 | 0.052894225 | 0.095871157 | 0.17084401  |
|            | 3       | 0.010271958          | 0.01003688  | 0.066081925 | 0.09901963  | 0.145503374 |
|            | 4       | 0.005495412          | 0.02660409  | 0.061576929 | 0.101707684 | 0.160052863 |
|            | 5       | 0.01714745           | 0.029793915 | 0.055256686 | 0.11295527  | 0.153895203 |
|            | Average | 0.009591133          | 0.018690016 | 0.060404759 | 0.104097302 | 0.159861164 |
|            | SE      | 0.002261287          | 0.004149243 | 0.002741009 | 0.003349252 | 0.004722851 |

Table S4 Effects of the ascorbic acid concentration with the saturated amount of water on the leaching of the metals from NMC by 0.6 mol/L D2EHAG diluted in *n*-dodecane. Experimental conditions: S/L = 10 g/L, heating at 333 K at 400 rpm for 24 h. SE represent standard error (n=5).

| Ascorbic acid | n       | Leaching efficiency (%L) |            |            |            |
|---------------|---------|--------------------------|------------|------------|------------|
|               |         | Li                       | Co         | Ni         | Mn         |
| 0 mol/L       | 1       | 21.0473749               | 12.3308513 | 11.9669511 | 12.224691  |
|               | 2       | 30.201688                | 19.7750153 | 19.2074861 | 21.0302529 |
|               | 3       | 24.6332828               | 14.2313765 | 13.5733946 | 15.1430345 |
|               | Average | 25.2941152               | 15.4457477 | 14.9159439 | 16.1326595 |
|               | SE      | 2.66319899               | 2.23307839 | 2.19531059 | 2.58965881 |
| 0.05 mol/L    | 1       | 69.0385305               | 76.6904399 | 72.2126858 | 74.4518817 |
|               | 2       | 68.4602731               | 76.0927523 | 70.9307871 | 77.2339351 |

|           |         |            |            |            |            |
|-----------|---------|------------|------------|------------|------------|
|           | 3       | 65.7850656 | 75.679922  | 70.6037422 | 74.50342   |
|           | Average | 67.7612897 | 76.1543714 | 71.2490717 | 75.3964123 |
|           | SE      | 1.00211308 | 0.29333388 | 0.49096968 | 0.91888186 |
| 0.1 mol/L | 1       | 85.675712  | 93.7726475 | 90.8493791 | 91.9741778 |
|           | 2       | 74.1973266 | 84.6507156 | 83.3254513 | 72.2343919 |
|           | 3       | 80.6248976 | 86.9777304 | 79.8455889 | 78.6297946 |
|           | Average | 80.1659787 | 88.4670312 | 84.6734731 | 80.9461214 |
|           | SE      | 3.32145989 | 2.73653814 | 3.24724097 | 5.81488933 |
|           |         |            |            |            |            |
| 0.2 mol/L | 1       | 82.6361992 | 80.7269212 | 72.9046777 | 74.7331177 |
|           | 2       | 91.0677156 | 83.5437307 | 75.2529753 | 78.5399327 |
|           | 3       | 74.3390749 | 96.9233866 | 96.3672947 | 76.986974  |
|           | Average | 82.6809965 | 87.0646795 | 81.5083159 | 76.7533415 |
|           | SE      | 4.82919456 | 4.99597115 | 7.46035216 | 1.10512417 |
|           |         |            |            |            |            |
| 0.3 mol/L | 1       | 77.8602979 | 97.8742916 | 97.255887  | 81.1463022 |
|           | 2       | 81.2178529 | 96.05394   | 97.7274339 | 74.983403  |
|           | 3       | 72.5853816 | 94.3189984 | 94.5092265 | 73.7363524 |
|           | Average | 77.2211775 | 96.08241   | 96.4975158 | 76.6220192 |
|           | SE      | 2.51238573 | 1.02642346 | 1.00342081 | 2.29060666 |
|           |         |            |            |            |            |
| 0.4 mol/L | 1       | 65.9895617 | 94.7625411 | 93.9708104 | 79.8355271 |
|           | 2       | 75.5660146 | 92.9207315 | 95.2749419 | 71.5753065 |
|           | 3       | 68.8690334 | 99.2062143 | 98.979131  | 75.9410286 |
|           | Average | 70.1415365 | 95.6298289 | 96.0749611 | 75.7839541 |
|           | SE      | 2.83675642 | 1.86556199 | 1.50009353 | 2.38581329 |
|           |         |            |            |            |            |

Table S5 Effects of the amount of water with 0.1 mol/L ascorbic acid on the leaching of the metals from NMC by 0.6 mol/L D2EHAG diluted in *n*-dodecane. Experimental conditions: S/L = 10 g/L, heating at 333 K at 400 rpm for 24 h. SE represent standard error (n=3).

| Water content    | n       | Leaching efficiency (%L) |            |            |            |
|------------------|---------|--------------------------|------------|------------|------------|
|                  |         | Li                       | Co         | Ni         | Mn         |
| No loading water | 1       | 9.90690142               | 6.95000709 | 6.59141761 | 8.54849612 |
|                  | 2       | 5.44557649               | 2.82525636 | 2.52051885 | 3.03567815 |
|                  | 3       | 5.6321635                | 2.89607091 | 2.60388231 | 3.09330103 |
|                  | Average | 6.99488047               | 4.22377812 | 3.90527292 | 4.89249177 |
|                  | SE      | 1.45700643               | 1.36326776 | 1.34328792 | 1.82807786 |
| 1 vol%           | 1       | 45.1540568               | 69.6424473 | 69.0690816 | 76.874162  |

|                 |         |            |            |            |            |
|-----------------|---------|------------|------------|------------|------------|
|                 | 2       | 48.2496304 | 79.1957082 | 78.3660374 | 84.2655957 |
|                 | 3       | 38.1450584 | 44.9855959 | 44.4106083 | 54.1371313 |
|                 | Average | 43.8495818 | 64.6079171 | 63.9485758 | 71.758963  |
|                 | SE      | 2.98897056 | 10.1913823 | 10.1309341 | 9.06559499 |
| 2 vol%          | 1       | 62.2404418 | 94.7676902 | 95.1306912 | 86.3462977 |
|                 | 2       | 63.4506814 | 91.9311432 | 92.6982073 | 81.2938294 |
|                 | 3       | 61.0654609 | 88.56138   | 88.1180215 | 89.6476403 |
|                 | Average | 62.2521947 | 91.7534045 | 91.9823067 | 85.7625891 |
|                 | SE      | 0.68857891 | 1.79381018 | 2.0557861  | 2.42913398 |
| 3 vol%          | 1       | 66.3773282 | 93.1232201 | 95.0026467 | 77.1323517 |
|                 | 2       | 78.3414718 | 92.4453572 | 94.6221999 | 77.6795105 |
|                 | 3       | 71.7703003 | 97.1608779 | 94.2923416 | 77.1201706 |
|                 | Average | 72.1630335 | 94.2431517 | 94.6390627 | 77.3106776 |
|                 | SE      | 3.45932857 | 1.47192831 | 0.2052207  | 0.18444998 |
| Saturated water | 1       | 77.8602979 | 97.8742916 | 97.255887  | 81.1463022 |
|                 | 2       | 81.2178529 | 96.05394   | 97.7274339 | 74.983403  |
|                 | 3       | 72.5853816 | 94.3189984 | 94.5092265 | 73.7363524 |
|                 | Average | 77.2211775 | 96.08241   | 96.4975158 | 76.6220192 |
|                 | SE      | 2.51238573 | 1.02642346 | 1.00342081 | 2.29060666 |

Table S6 Summary of the effects of D2EHAG and the additives on the leaching efficiency. Experimental conditions: S/L = 10 g/L, heating at 333 K at 400 rpm for 24 h. SE represent standard error (n=3).

|                                                | n       | Leaching efficiency (%L) |            |            |            |
|------------------------------------------------|---------|--------------------------|------------|------------|------------|
|                                                |         | Li                       | Co         | Ni         | Mn         |
| 0.6 mol/L D2EHAG                               | 1       | 3.68703269               | 0.44486478 | 0.46877273 | 0.68429746 |
|                                                | 2       | 3.4517925                | 0.4016669  | 0.42544226 | 0.63049439 |
|                                                | 3       | 3.26953921               | 0.34830591 | 0.35958179 | 0.57618825 |
|                                                | Average | 3.4694548                | 0.3982792  | 0.41793226 | 0.6303267  |
|                                                | SE      | 0.12084311               | 0.02792556 | 0.03174358 | 0.03120855 |
| 0.6 mol/L D2EHAG<br>0.1 mol/L Ascorbic<br>acid | 1       | 9.90690142               | 6.95000709 | 6.59141761 | 8.54849612 |
|                                                | 2       | 5.44557649               | 2.82525636 | 2.52051885 | 3.03567815 |
|                                                | 3       | 5.6321635                | 2.89607091 | 2.60388231 | 3.09330103 |
|                                                | Average | 6.99488047               | 4.22377812 | 3.90527292 | 4.89249177 |
|                                                | SE      | 1.45700643               | 1.36326776 | 1.34328792 | 1.82807786 |

|                                                                   |         |            |            |            |            |
|-------------------------------------------------------------------|---------|------------|------------|------------|------------|
| 0.6 mol/L D2EHAG<br>Saturated water                               | 1       | 21.0473749 | 12.3308513 | 11.9669511 | 12.224691  |
|                                                                   | 2       | 30.201688  | 19.7750153 | 19.2074861 | 21.0302529 |
|                                                                   | 3       | 24.6332828 | 14.2313765 | 13.5733946 | 15.1430345 |
|                                                                   | Average | 25.2941152 | 15.4457477 | 14.9159439 | 16.1326595 |
|                                                                   | SE      | 2.66319899 | 2.23307839 | 2.19531059 | 2.58965881 |
| 0.6 mol/L D2EHAG<br>0.3 mol/L Ascorbic<br>acid<br>Saturated water | 1       | 77.8602979 | 97.8742916 | 97.255887  | 81.1463022 |
|                                                                   | 2       | 81.2178529 | 96.05394   | 97.7274339 | 74.983403  |
|                                                                   | 3       | 72.5853816 | 94.3189984 | 94.5092265 | 73.7363524 |
|                                                                   | Average | 77.2211775 | 96.08241   | 96.4975158 | 76.6220192 |
|                                                                   | SE      | 2.51238573 | 1.02642346 | 1.00342081 | 2.29060666 |

Table S7 Leaching efficiencies of the metals from the LiB black mass by 0.6 mol/L D2EHAG in *n*-dodecane with 0.3 mol/L ascorbic acid and a saturated amount of water. Experimental conditions: S/L = 10 g/L, heating at 333 K at 400 rpm for 24 h. SE represent standard error (n=3).

| n       | Leaching efficiency (%L) |            |            |            |            |            |
|---------|--------------------------|------------|------------|------------|------------|------------|
|         | Li                       | Co         | Ni         | Mn         | Cu         | Al         |
| 1       | 68.5583988               | 101.133978 | 104.817603 | 96.7547682 | 34.0751848 | 77.7774225 |
| 2       | 69.9488481               | 99.8632273 | 103.557236 | 95.0120597 | 28.4317758 | 81.8706596 |
| 3       | 70.7350628               | 97.2642906 | 100.862919 | 90.713034  | 26.9491956 | 85.0437286 |
| Average | 69.7474366               | 99.4204987 | 103.079253 | 94.159954  | 29.8187187 | 81.5639369 |
| SE      | 0.63636769               | 1.13880449 | 1.16636647 | 1.79538307 | 2.17083997 | 2.10320075 |

Table S8 Stripping efficiencies of the metals from loaded D2EHAG in *n*-dodecane at different concentrations of sulfuric acid. Experimental conditions: A/O = 1/1, shaking at room temperature at 1500 rpm for 1 h. SE represent standard error (n=3).

| H <sub>2</sub> SO <sub>4</sub> in water<br>phase | n       | Stripping efficiency (%S) |            |            |            |
|--------------------------------------------------|---------|---------------------------|------------|------------|------------|
|                                                  |         | Li                        | Co         | Ni         | Mn         |
| 0.001 mol/L                                      | 1       | 95.5926251                | 2.64067127 | -0.7730673 | 59.8978289 |
|                                                  | 2       | 96.0598291                | 3.75383044 | 0.15120968 | 61.3684211 |
|                                                  | 3       | 96.4041746                | 1.96078431 | -2.4301965 | 60.4247788 |
|                                                  | Average | 96.0188762                | 2.78509534 | -1.0173514 | 60.5636762 |
|                                                  | SE      | 0.2351673                 | 0.52262075 | 0.75513144 | 0.43016653 |
| 0.005 mol/L                                      | 1       | 95.5838455                | 3.06021718 | -1.2219451 | 63.1545338 |
|                                                  | 2       | 96.1965812                | 1.07252298 | 0.75604839 | 66.245614  |



|             |         |            |            |            |            |
|-------------|---------|------------|------------|------------|------------|
|             | 3       | 96.3946869 | 4.8245614  | -0.0258532 | 63.9646018 |
|             | Average | 96.0583712 | 2.98576719 | -0.1639166 | 64.4549165 |
|             | SE      | 0.24405768 | 1.08375969 | 0.57515527 | 0.92538292 |
| 0.01 mol/L  | 1       | 95.7418788 | 4.3928924  | -1.4962594 | 67.4329502 |
|             | 2       | 96.3076923 | 1.659857   | -0.5040323 | 70.0140351 |
|             | 3       | 96.6223909 | 5.93395253 | -0.4136505 | 68.7079646 |
|             | Average | 96.2239873 | 3.99556731 | -0.8046474 | 68.7183166 |
|             | SE      | 0.25760451 | 1.24971644 | 0.34678888 | 0.74511301 |
|             |         |            |            |            |            |
| 0.015 mol/L | 1       | 95.8735733 | 7.52714709 | 0.12468828 | 71.3346105 |
|             | 2       | 96.4700855 | 6.2308478  | 1.28528226 | 73.8350877 |
|             | 3       | 96.8026565 | 8.95252838 | 0.15511892 | 72.8035398 |
|             | Average | 96.3821051 | 7.57017442 | 0.52169649 | 72.657746  |
|             | SE      | 0.27178688 | 0.785976   | 0.38189393 | 0.72549718 |
|             |         |            |            |            |            |
| 0.02 mol/L  | 1       | 95.8823529 | 6.63869694 | -3.3665835 | 72.9885057 |
|             | 2       | 96.4529915 | 10.7763023 | 2.09173387 | 76.7157895 |
|             | 3       | 96.8975332 | 13.4932921 | 1.99069286 | 76.5061947 |
|             | Average | 96.4109592 | 10.3027638 | 0.2386144  | 75.4034966 |
|             | SE      | 0.2938099  | 1.99286625 | 1.80283494 | 1.20901037 |
|             |         |            |            |            |            |
| 0.03 mol/L  | 1       | 96.2159789 | 14.0918065 | -1.4214464 | 79.0038314 |
|             | 2       | 96.6923077 | 16.8539326 | 1.89012097 | 80.9368421 |
|             | 3       | 97.0208729 | 17.7244582 | 0.18097208 | 80.1699115 |
|             | Average | 96.6430532 | 16.2233991 | 0.21654889 | 80.0368617 |
|             | SE      | 0.23365435 | 1.09502191 | 0.95613264 | 0.5619636  |
|             |         |            |            |            |            |
| 0.04 mol/L  | 1       | 96.3915716 | 23.9141165 | -2.5187032 | 83.3333333 |
|             | 2       | 96.8974359 | 31.6649642 | 1.83971774 | 85.5894737 |
|             | 3       | 97.2011385 | 29.3085655 | 0.15511892 | 84.9132743 |
|             | Average | 96.8300487 | 28.2958821 | -0.1746222 | 84.6120271 |
|             | SE      | 0.23611822 | 2.29405435 | 1.26892412 | 0.66848205 |
|             |         |            |            |            |            |
| 0.05        | 1       | 96.0491659 | 31.6880553 | 0.42394015 | 84.9553001 |
|             | 2       | 96.8803419 | 40.040858  | 3.15020161 | 86.8035088 |
|             | 3       | 97.2296015 | 39.6026832 | 2.48190279 | 86.7469027 |
|             | Average | 96.7197031 | 37.1105322 | 2.01868152 | 86.1685705 |
|             | SE      | 0.3501003  | 2.71418747 | 0.82037712 | 0.60685524 |
|             |         |            |            |            |            |
| 0.1 mol/L   | 1       | 96.8305531 | 75.9896347 | 4.21446384 | 91.9636015 |
|             | 2       | 97.1196581 | 80.5388151 | 10.5090726 | 93.0070175 |

|            |         |            |            |            |            |
|------------|---------|------------|------------|------------|------------|
|            | 3       | 97.5996205 | 81.1377709 | 9.61737332 | 93.3061947 |
|            | Average | 97.1832772 | 79.2220736 | 8.11363658 | 92.7589379 |
|            | SE      | 0.22427788 | 1.62544175 | 1.96650646 | 0.40693846 |
| 0.15 mol/L | 1       | 98.4196664 | 93.1614018 | 36.7331671 | 96.2164751 |
|            | 2       | 98.3760684 | 92.3008172 | 33.8205645 | 95.5263158 |
|            | 3       | 98.5104364 | 92.4277606 | 33.3505688 | 95.5787611 |
|            | Average | 98.4353904 | 92.6299932 | 34.6347668 | 95.7738506 |
|            | SE      | 0.03957747 | 0.26821943 | 1.05793617 | 0.22182946 |
| 0.2 mol/L  | 1       | 98.3933275 | 94.5261599 | 53.5660848 | 96.4623244 |
|            | 2       | 98.4358974 | 95.3217569 | 59.2237903 | 96.8350877 |
|            | 3       | 98.3586338 | 95.0954592 | 57.6525336 | 96.7787611 |
|            | Average | 98.3959529 | 94.9811254 | 56.8141362 | 96.6920577 |
|            | SE      | 0.02234269 | 0.23667686 | 1.68617818 | 0.11601182 |
| 0.3 mol/L  | 1       | 98.4021071 | 97.55923   | 86.0349127 | 97.8863346 |
|            | 2       | 98.4700855 | 97.5357508 | 86.3860887 | 97.7052632 |
|            | 3       | 98.4914611 | 97.9798762 | 93.5935884 | 98.0106195 |
|            | Average | 98.4830142 | 97.5213403 | 86.2439188 | 97.7600311 |
|            | SE      | 0.05085647 | 0.02701415 | 0.10674182 | 0.06333698 |
| 0.4 mol/L  | 1       | 98.3494293 | 98.0997038 | 93.925187  | 98.2535121 |
|            | 2       | 98.4188034 | 97.9775281 | 93.6113911 | 97.9964912 |
|            | 3       | 98.4914611 | 97.9798762 | 93.5935884 | 98.0106195 |
|            | Average | 98.4198979 | 98.019036  | 93.7100555 | 98.0868743 |
|            | SE      | 0.04100469 | 0.0403396  | 0.10768845 | 0.08341869 |
| 0.5 mol/L  | 1       | 98.2528534 | 98.213228  | 95.957606  | 98.298212  |
|            | 2       | 98.2136752 | 98.1562819 | 95.8694556 | 98.1017544 |
|            | 3       | 98.4914611 | 98.0624355 | 95.6592554 | 98.0566372 |
|            | Average | 98.3193299 | 98.1439818 | 95.8287724 | 98.1522012 |
|            | SE      | 0.08680552 | 0.04396236 | 0.08849597 | 0.07415807 |
| 1.0 mol/L  | 1       | 96.2949956 | 97.857848  | 97.1645885 | 97.4904215 |
|            | 2       | 96.1794872 | 97.9341164 | 97.3210685 | 97.5789474 |
|            | 3       | 96.7077799 | 97.876677  | 97.1535677 | 97.539823  |
|            | Average | 96.3940876 | 97.8895471 | 97.2130749 | 97.5363973 |
|            | SE      | 0.16035139 | 0.02293796 | 0.05409045 | 0.02561257 |

Table S9 Reusability of the organic solvent using D2EHAG as the leaching agent. Before each

leaching, 0.3 mol/L ascorbic acid was added to the organic solvent. Leaching experiment conditions: S/L = 10 g/L, heating at 333 K at 400 rpm for 24 h. After leaching, the organic phase was stripped by 1.00 mol/L H<sub>2</sub>SO<sub>4</sub>. Stripping experiment conditions: A/O = 1:1, shaking at room temperature at 1500 rpm for 1 h. SE represent standard error (n=3).

|                       |         | Leaching efficiency (%L) |            |            |            |
|-----------------------|---------|--------------------------|------------|------------|------------|
| n                     |         | Li                       | Co         | Ni         | Mn         |
| 1 <sup>st</sup> times | 1       | 92.4787995               | 102.693757 | 102.177647 | 91.3634139 |
|                       | 2       | 89.250684                | 96.8597117 | 96.6912141 | 89.1569912 |
|                       | 3       | 90.1426243               | 96.8801793 | 96.4392463 | 89.7397205 |
|                       | Average | 90.6240359               | 98.8112158 | 98.4360357 | 90.0867085 |
|                       | SE      | 0.96246217               | 1.94127932 | 1.87221897 | 0.66014537 |
| 2 <sup>nd</sup> times | 1       | 71.8681838               | 94.5288785 | 94.6459965 | 87.1072654 |
|                       | 2       | 89.3891722               | 96.252127  | 98.1711964 | 102.611598 |
|                       | 3       | 84.9910416               | 92.6302633 | 92.5195333 | 89.0295553 |
|                       | Average | 82.0827992               | 94.4704229 | 95.112242  | 92.9161396 |
|                       | SE      | 5.26275162               | 1.04595045 | 1.6480658  | 4.87938644 |
| 3 <sup>rd</sup> times | 1       | 72.7359973               | 98.9942461 | 100.969037 | 73.7939831 |
|                       | 2       | 86.467316                | 96.8627091 | 98.1951736 | 71.5199018 |
|                       | 3       | 85.9811544               | 97.4271485 | 98.9344095 | 71.2040244 |
|                       | Average | 81.7281559               | 97.7613679 | 99.3662067 | 72.1726364 |
|                       | SE      | 4.49826912               | 0.63761    | 0.8293403  | 0.8157856  |
